# Supplementary material for: Transcriptome Analysis of Gerbera hybrida Ray Florets: Putative Genes Associated with Gibberellin Metabolism and Signal Transduction
Source: PLoS One. 2013 Mar 5;8(3):e57715. doi: 10.1371/journal.pone.0057715 (PMC3589416; doi:10.1371/journal.pone.0057715)
Supplement: Table S3 — Statistics of signal transduction genes in other hormones. (XLSX) [file pone.0057715.s003.xlsx]

## Sheet: table s3
Table S3: Statistics of signal transduction genes in other hormones
Signal transduction pathway	Receptor	Transcript factor	Count of transcripts
Auxin	AUX1		9
		TIR1	30
		AUX/IAA	30
		ARF	73
		GH3	15
		SAUR	18
Cytokinine	CRE1		23
		AHP	2
		B-ARR	23
		A-ARR	7
Abscisic acid	PYP/PYL		14
		PP2C	117
		SnRK2	11
Ethylene	ETR		15
		CTR1	30
	EIN2		3
		EIN3	8
		EBF1/2	3
		ERF1/2	7
	BRI1		11
		BKI1	1
		BSK	3
		BSU1	16
		BZR1/2	11
		CYCD3	9
Jasmonic acid		JAR1	6
		COI1	8
		JAZ	13
		MYC2	12
Salicylic acid		NPR1	6
		TGA	12
		PR-1	3
